# Supplementary material for: DNA Polymerase ι Interacts with Both the TRAF-like and UBL1-2 Domains of USP7
Source: PubMed Central journal article supplement — J Mol Biol. Author manuscript; Available in PMC 2021 Feb 10. (PMC7873624; doi:10.1016/j.jmb.2020.166733), 2020-12-03
Supplement: NIHMS1660875-supplement-5.pdf [file NIHMS1660875-supplement-5.pdf]

Supplemental Information for:

**DNA polymerase  $\epsilon$  interacts with the TRAF-like and UBL1-2 domains of USP7**

Nicholas W. Ashton<sup>a†</sup>, Gabrielle J. Valles<sup>b†</sup>, Nancy Jaiswal<sup>b</sup>, Irina Bezsonova<sup>b\*</sup>, Roger Woodgate<sup>a\*</sup>

<sup>a</sup> Laboratory of Genomic Integrity, National Institute of Child Health and Human Development, National Institutes of Health, 9800 Medical Center Drive, Bethesda, MD 20892-3371, USA

<sup>b</sup> Department of Molecular Biology and Biophysics, UConn Health, Farmington, CT 06030, USA

\* Correspondence should be addressed to:

Irina Bezsonova. Tel: +1 860-679-2769, Email: bezsonova@uchc.edu

Roger Woodgate. Tel: +1 301-435-0740, Email: woodgate@mail.nih.gov

† The authors wish it to be known that, in their opinion, the first two authors should be regarded as joint First Authors.

**This document includes:**

Figures S1 to S6

References for Supplemental Material

Legend for Dataset 1

Legends for Movies 1 to 3

## Supplemental Figures

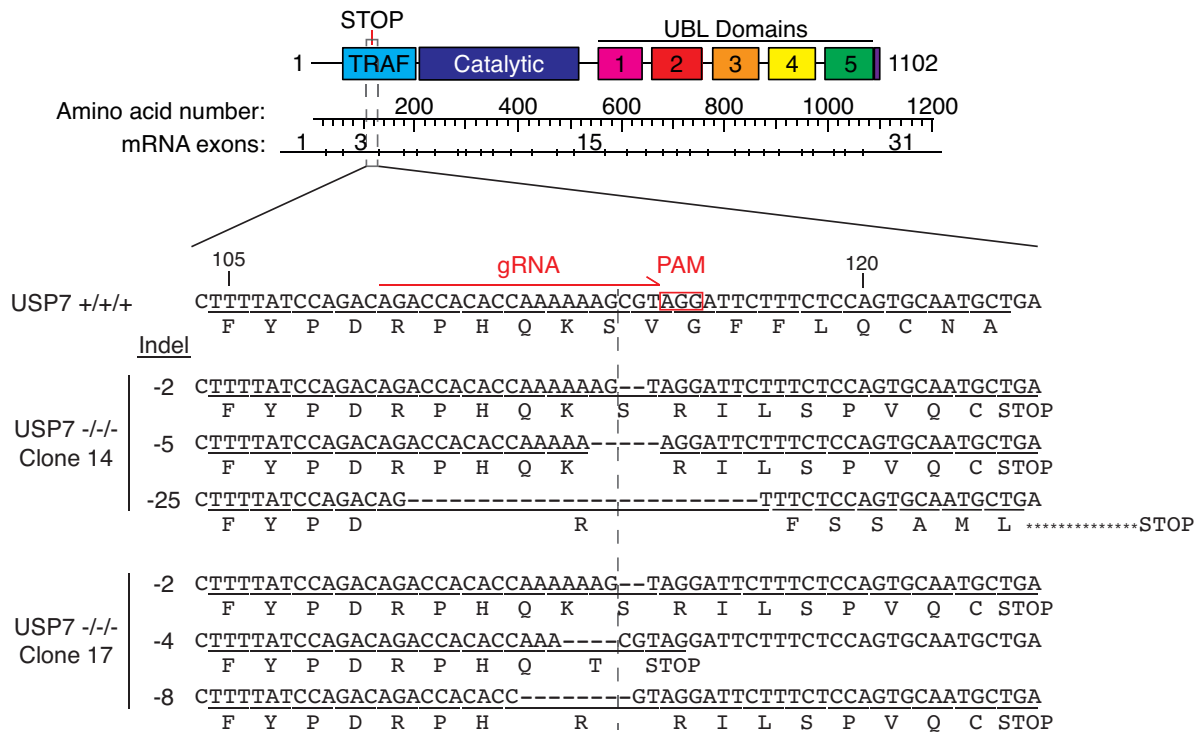

**Supplemental Figure 1: Indel analysis of 293T USP7 knock-out cells.** USP7 is encoded on chromosome 16; 293T cells are hypotriploid and contain three copies of this chromosome [1]. Exon 3 of the *USP7* gene was targeted using the Cas9-expressing construct px330-U6-Chimeric\_BB-Cbh-hSpCas9 and the indicated guide RNA. The vertical dashed line indicates the site of the induced double-strand break. The numbers above the nucleotide residues indicate the corresponding USP7 amino acid number, and the letters below indicate the encoded amino acids. Horizontal dashes indicate lost nucleotides. Asterisks indicate additional encoded amino acids not shown here.

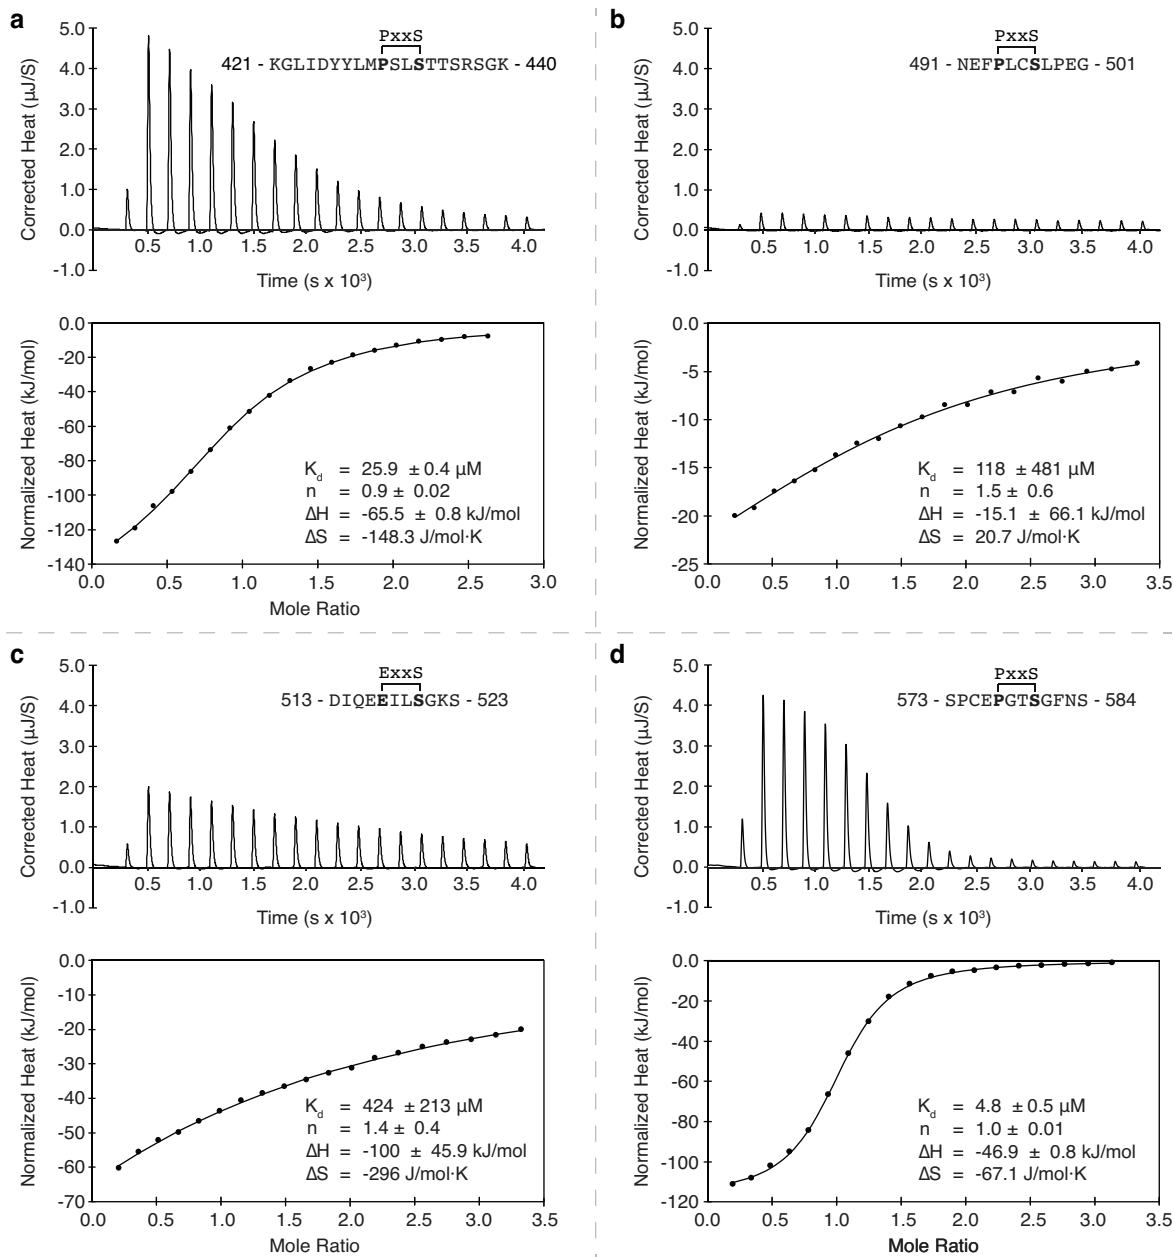

**Supplemental Figure 2: ITC profiles of binding between the USP7 TRAF domain and Pol I peptides. (a - d)** The top panels show heat change upon the addition of the indicated peptide; the bottom panels show an integrated ITC isotherm and its best fit to an independent site model. (d) is also shown in Figure 4c.

| Protein     | Sequence                                                                                                                      | $K_d \pm S.D. (\mu M)$ |
|-------------|-------------------------------------------------------------------------------------------------------------------------------|------------------------|
|             | <b>E</b>                                                                                                                      |                        |
|             | <b>A</b>                                                                                                                      |                        |
|             | <b>P x x S</b>                                                                                                                |                        |
| p53         | 356- <b>GKE</b> <b>PPGG</b> <b>S</b> <b>RAH</b> -365                                                                          | 18.5 ± 1.3             |
| p53         | 358- <b>EPGG</b> <b>SRAHSS</b> -367                                                                                           | 18.2 ± 1.7             |
| Mdm2        | 143- <b>QEEK</b> <b>PSS</b> <b>S</b> <b>HL</b> -152                                                                           | 8.0 ± 0.3              |
| Mdm2        | 152- <b>LVS</b> <b>RPST</b> <b>S</b> <b>SR</b> -161                                                                           | 7.5 ± 0.3              |
| Mdm4        | 395- <b>LDL</b> <b>AHSS</b> <b>S</b> <b>ESQ</b> -404                                                                          | N.D.                   |
| Ube2E1      | 5- <b>DS</b> <b>RAST</b> <b>S</b> <b>SSS</b> -14                                                                              | 9.4 ± 2.1              |
| MCM-BP      | 152- <b>RV</b> <b>SPST</b> <b>S</b> <b>YTP</b> -161                                                                           | N.D.                   |
| EBNA1       | 441- <b>DP</b> <b>GEGP</b> <b>S</b> <b>T</b> -450                                                                             | 0.9                    |
| vIRF1       | 44- <b>SP</b> <b>GEGP</b> <b>S</b> <b>GTG</b> -53                                                                             | 2.0 ± 0.1              |
| vIRF4       | 202- <b>SV</b> <b>WIPV</b> <b>NEGAS</b> <b>T</b> <b>SMG</b> -216                                                              | 0.4 ± 0.01             |
| Rad18       | 186- <b>KR</b> <b>PEPP</b> <b>S</b> <b>T</b> <b>STLK</b> -197                                                                 | N.D.                   |
| Pol $\iota$ | 421- <b>KGL</b> <b>IDYY</b> <b>LMP</b> <b>SL</b> <b>S</b> <b>T</b> <b>T</b> <b>S</b> <b>R</b> <b>S</b> <b>G</b> <b>K</b> -440 | 25.9 ± 0.4             |
| Pol $\iota$ | 573- <b>SP</b> <b>CE</b> <b>PGT</b> <b>S</b> <b>G</b> <b>F</b> <b>N</b> <b>S</b> -584                                         | 4.8 ± 0.5              |

### Supplemental Figure 3: Alignment of TRAF binding peptides from USP7 substrate

**proteins.** The location of the TRAF-binding motif (P/A/ExxS) is indicated above the alignment.

Shading indicates: black = conserved residue, gray = partially conserved residue. Peptide sequences and  $K_d$  values are listed for p53 [2], Mdm2 [2], Mdm4 [3], Ube2E1 [4], MCM-BP [5], EBNA1 [6], vIRF1 [7], vIRF4 [8], Rad18 [9] and Pol  $\iota$ .  $K_d$  values are from ITC (vIRF4, Pol  $\iota$ ), fluorescence polarization (vIRF1) or tryptophan fluorescence (p53, Mdm2, Ube2E1, EBNA1) measurements of the indicated peptides binding to recombinant TRAF (p53, Mdm2, Ube2E1, vIRF1, vIRF4, Pol  $\iota$ ) or full length USP7 (EBNA1).

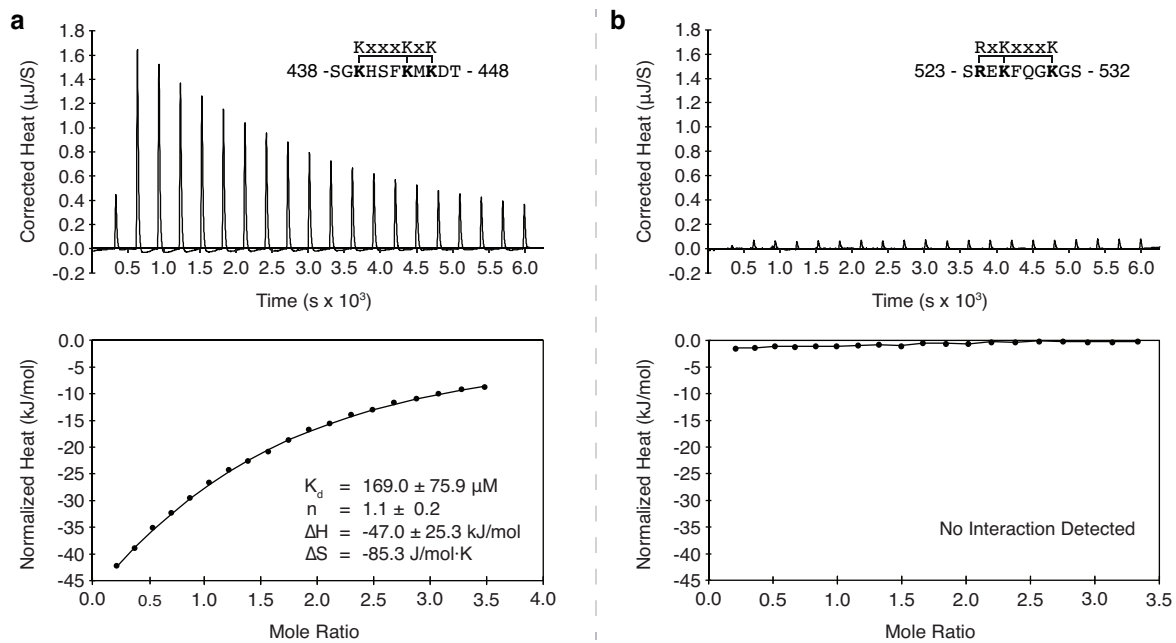

**Supplemental Figure 4: ITC profiles for UBL1-2 of USP7 binding to Pol  $\tau$  peptides. (a and b) The top panels show heat change upon the addition of the indicated peptide; the bottom panels show an integrated ITC isotherm and its best fit to an independent site model. (a) is also shown in Figure 6b.**

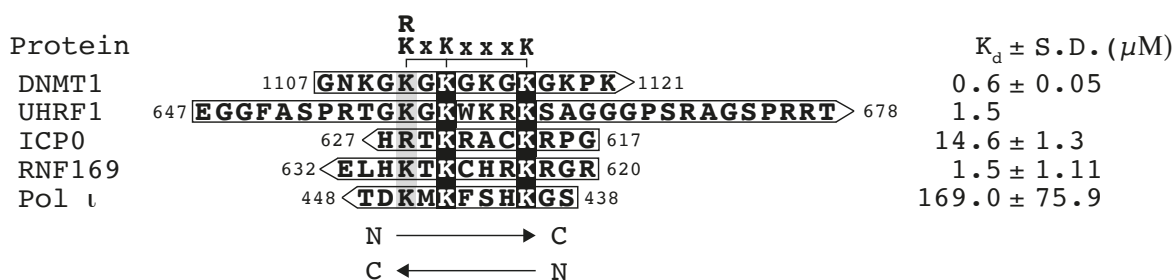

**Supplemental Figure 5. Alignment of UBL1-2 binding peptides from USP7 substrate**

**proteins.** The arrows indicate the orientation of each peptide when bound to USP7 UBL1-2.

Shading indicates: black = conserved residue, gray = conservative mutation. Peptide sequences

and  $K_d$  values are listed for DNMT1 [10], UHRF1 [11], ICP0 [12], RNF169 [13] and Pol  $\iota$ .  $K_d$

values were derived from ITC measurements of the indicated peptides binding to recombinant

UBL1-2 (for UHRF1, ICP0, and Pol  $\iota$ ) or UBL1-3 (for RNF169). This is with the exception of

DNMT1, where binding was measured between a large DNMT1 fragment (residues 600-1600)

and the USP7 C-terminus (residues 560-1102).



## References for Supplemental Material

- [1] Lin Y-C, Boone M, Meuris L, Lemmens I, Van Roy N, Soete A, Reumers J, Moisse M, Plaisance S, Drmanac R, Chen J, Speleman F, Lambrechts D, Van de Peer Y, Tavernier J, Callewaert N. (2014). Genome dynamics of the human embryonic kidney 293 lineage in response to cell biology manipulations. *Nat Commun.* 5, 4767.
- [2] Sheng Y, Saridakis V, Sarkari F, Duan S, Wu T, Arrowsmith CH, Frappier L. (2006). Molecular recognition of p53 and MDM2 by USP7/HAUSP. *Nat Struct Mol Biol.* 13, 285-291.
- [3] Kim RQ, Sixma TK. (2017). Regulation of USP7: a high incidence of E3 complexes. *J Mol Biol.* 429, 3395-3408.
- [4] Sarkari F, Wheaton K, La Delfa A, Mohamed M, Shaikh F, Khatun R, Arrowsmith CH, Frappier L, Saridakis V, Sheng Y. (2013). Ubiquitin-specific protease 7 is a regulator of ubiquitin-conjugating enzyme UbE2E1. *J Biol Chem.* 288, 16975-16985.
- [5] Jagannathan M, Nguyen T, Gallo D, Luthra N, Brown GW, Saridakis V, Frappier L. (2014). A role for USP7 in DNA replication. *Mol Cell Biol.* 34, 132-145.
- [6] Saridakis V, Sheng Y, Sarkari F, Holowaty MN, Shire K, Nguyen T, Zhang RG, Liao J, Lee W, Edwards AM, Arrowsmith CH, Frappier L. (2005). Structure of the p53 binding domain of HAUSP/USP7 bound to Epstein-Barr nuclear antigen 1. *Mol Cell.* 18, 25-36.
- [7] Chavoshi S, Egorova O, Lacdao IK, Farhadi S, Sheng Y, Saridakis V. (2016). Identification of Kaposi sarcoma herpesvirus (KSHV) vIRF1 protein as a novel interaction partner of human deubiquitinase USP7. *J Biol Chem.* 291, 6281-6291.
- [8] Lee H-R, Choi W-C, Lee S, Hwang J, Hwang E, Guchhait K, Haas J, Toth Z, Jeon YH, Oh T-K, Kim MH, Jung JU. (2011). Bilateral inhibition of HAUSP deubiquitinase by a viral interferon regulatory factor protein. *Nat Struct Mol Biol.* 18, 1336-1344.



- [9] Zlatanou A, Sabbioneda S, Miller ES, Greenwalt A, Aggathangelou A, Maurice MM, Lehmann AR, Stankovic T, Reverdy C, Colland F, Vaziri C, Stewart GS. (2016). USP7 is essential for maintaining Rad18 stability and DNA damage tolerance. *Oncogene*. 35, 965-976.
- [10] Cheng J, Yang H, Fang J, Ma L, Gong R, Wang P, Li Z, Xu Y. (2015). Molecular mechanism for USP7-mediated DNMT1 stabilization by acetylation. *Nat Commun*. 6, 7023.
- [11] Zhang Z-M, Scott, David, Cai Q, Joseph, Li L, Wang Y, Brian, Gang, Song J. (2015). An allosteric interaction links USP7 to deubiquitination and chromatin targeting of UHRF1. *Cell Rep*. 12, 1400-1406.
- [12] Pozhidaeva AK, Mohni KN, Dhe-Paganon S, Arrowsmith CH, Weller SK, Korzhnev DM, Bezsonova I. (2015). Structural characterization of interaction between human ubiquitin-specific protease 7 and immediate-early protein ICP0 of herpes simplex virus-1. *J Biol Chem*. 290, 22907-22918.
- [13] An L, Jiang Y, Ng HHW, Man EPS, Chen J, Khoo U-S, Gong Q, Huen MSY. (2017). Dual-utility NLS drives RNF169-dependent DNA damage responses. *Proc Natl Acad Sci U S A*. 114, E2872-E2881.

### **Dataset 1 (separate file)**

**A dataset of Pol  $\iota$ -associating proteins identified by GeLC-MS/MS.** 293T cells were transfected with WT FLAG Pol  $\iota$ , or with an empty vector, 20 hours prior to cell lysis. M2 magnetic anti-FLAG beads were used to immunoprecipitate proteins from 3 mg of whole cell lysate. Eluents were electrophoresed 1 cm into a 1 mm 4-12% Bis-Tris NuPage precast gel and then excised as a single gel slice. Proteins were digested with trypsin and identified by GeLC-MS/MS.

### **Movie 1 (separate file)**

**A model of the USP7 TRAF-like domain in complex with Pol  $\iota$  peptide 573-584.** The USP7 TRAF domain is represented as a combined ribbon and space-filling model. Pol  $\iota$  peptide 573-584 is in pink; numbers represent the residue location within the full-length protein.

### **Movie 2 (separate file)**

**A model of the UBL1-2 domains in complex with Pol  $\iota$  peptide 438-448.** USP7 UBL1-2 is represented as a combined ribbon and space-filling model. Pol  $\iota$  peptide 438-448 is in purple; numbers represent the residue location within the full-length protein.

### **Movie 3 (separate file)**

**A model of full-length USP7 in an inactive, open conformation, in complex with Pol  $\iota$  peptides 573-584 (TRAF-binding) and 438-448 (UBL1-2-binding).** A space-filling model of full-length USP7. The location of each domain is indicated. The TRAF substrate-binding interface is indicated in blue. The UBL1-2 substrate-binding site is indicated in red. Pol  $\iota$  peptides 438-448 and 573-584 are modelled in blue.
